# Supplementary material
Source: MDPI journal article supplement (https://www.mdpi.com/2073-4352/13/2/231)
Supplement: s1 [file s1]

## Supplementary Information

### MOCVD-grown $\text{Ga}_2\text{O}_3$ as a gate dielectric on AlGaN/GaN based heterojunction field effect transistor.

Samiul Hasan<sup>1\*</sup>, Mohi Uddin Jewel<sup>1</sup>, Scott R. Crittenden<sup>2</sup>, Dongkyu Lee<sup>3</sup>, Vitaliy Avrutin<sup>4</sup>, Ümit Özgür<sup>4</sup>, Hadis Morkoç<sup>4</sup>, and Iftikhar Ahmad<sup>1\*</sup>

<sup>1</sup>*Department of Electrical Engineering, University of South Carolina, Columbia, SC 29208, USA*

<sup>2</sup>*Department of Physics and Astronomy, University of South Carolina, Columbia, SC 29208, USA*

<sup>3</sup>*Department of Mechanical Engineering, University of South Carolina, Columbia, SC 29208, USA*

<sup>4</sup>*Department of Electrical and Computer Engineering, Virginia Commonwealth University, Richmond, VA 23284, USA*

E-mail: shasan@email.sc.edu, ahmad@cec.sc.edu

(a)

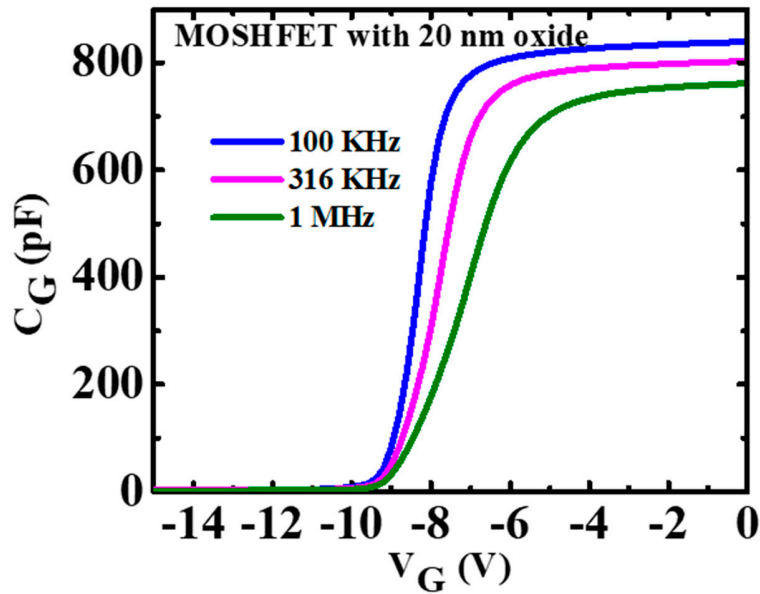

(b)

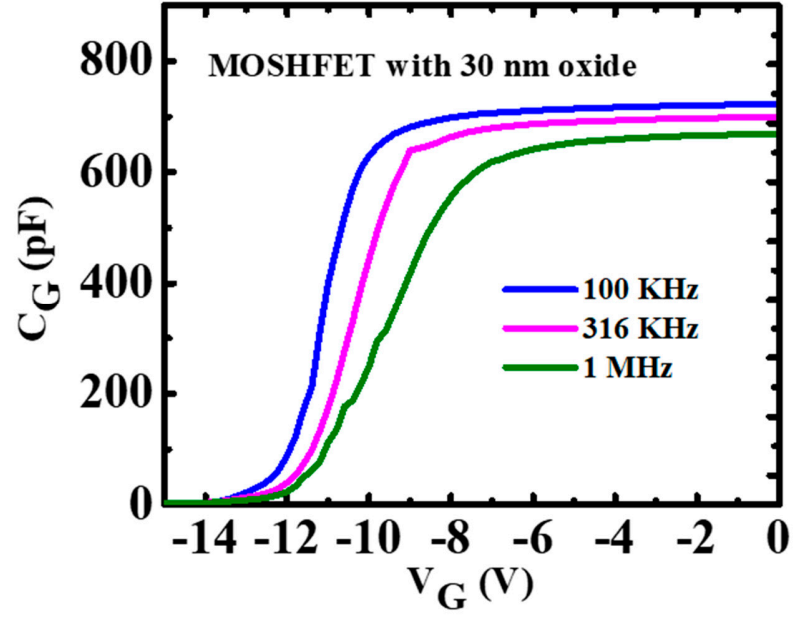

(c)

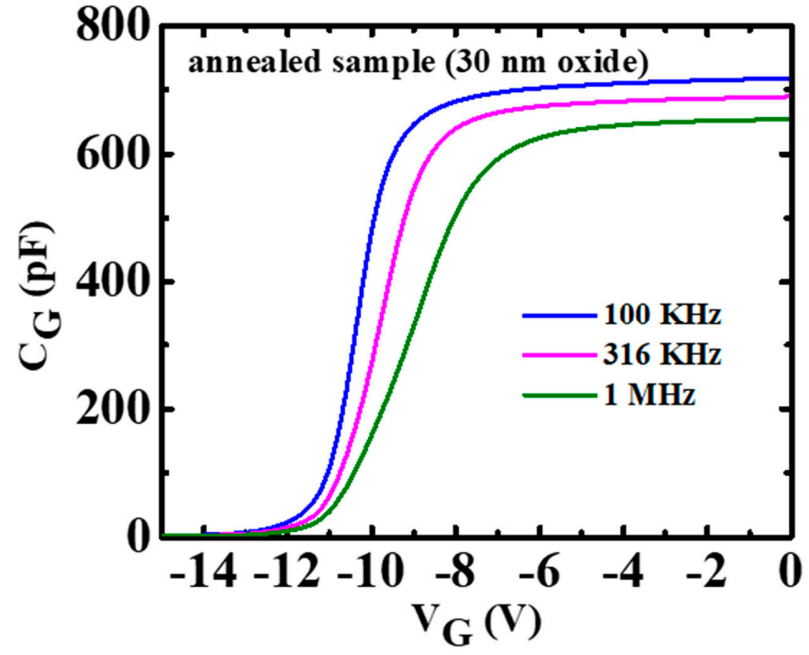

**Figure S1.** Frequency-dependent CV measurements of MOSHET with (a) 20 nm thick gate oxide (b) 30 nm thick gate oxide, and (c) annealed 30 nm thick gate oxide.

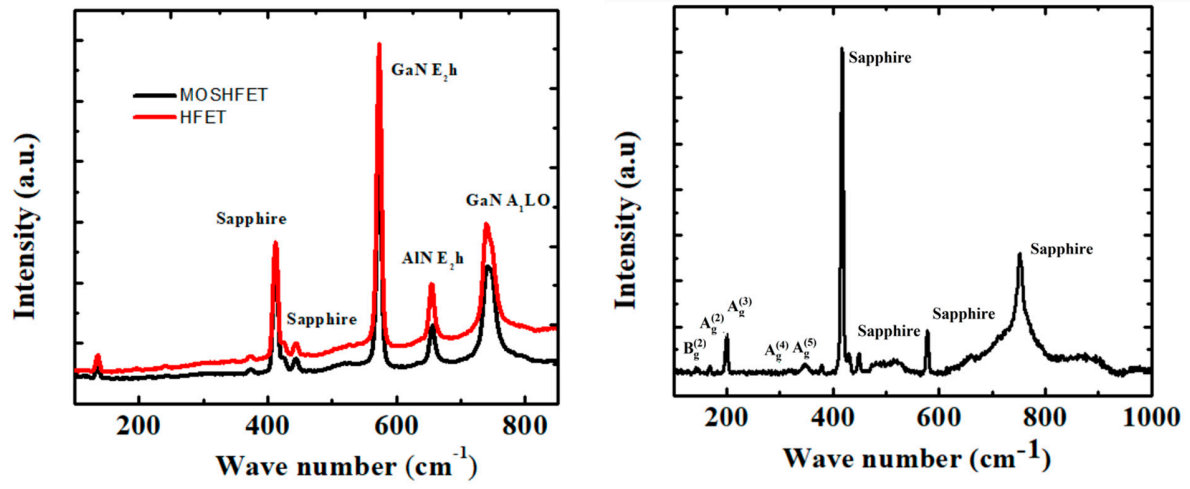

**Figure S2.** (a) Raman spectra of HFET and MOSFET (30 nm oxide), (b) Raman spectra of Ga<sub>2</sub>O<sub>3</sub> on sapphire to identify the Ga<sub>2</sub>O<sub>3</sub> signature peak positions.
